# Supplementary material for: Endocrine therapy-resistant breast cancer model cells are inhibited by soybean glyceollin I through Eleanor non-coding RNA
Source: PubMed Central journal article supplement (PMC6185934; doi:10.1038/s41598-018-33227-y), 2018-10-12

## Supplementary materials

### Endocrine therapy-resistant breast cancer model cells are inhibited by soybean glyceollin I through *Eleanor* non-coding RNA

#### Authors:

Tatsuro Yamamoto<sup>1,2,6,#</sup>, Chiyomi Sakamoto<sup>1,#</sup>, Hiroaki Tachiwana<sup>2</sup>, Mitsuru Kumabe<sup>1</sup>, Toshiro Matsui<sup>3</sup>, Tadatoshi Yamashita<sup>4</sup>, Masatoshi Shinagawa<sup>5</sup>, Koji Ochiai<sup>5</sup>, Noriko Saitoh<sup>1,2\*</sup>, and Mitsuyoshi Nakao<sup>1\*</sup>

#### Affiliations:

<sup>1</sup> Department of Medical Cell Biology, Institute of Molecular Embryology and Genetics, Kumamoto University, 2-2-1 Honjo, Chuo-ku, Kumamoto 860-0811, Japan

<sup>2</sup> Division of Cancer Biology, The Cancer Institute of JFCR, 3-8-31 Ariake, Koto-ku, Tokyo 135-8550, Japan

<sup>3</sup> Faculty of Agriculture, Graduate School of Kyushu University, 744 Mototoka, Nishi-ku, Fukuoka 819-0395, Japan

<sup>4</sup> Tokiwa Phytochemical Co. Ltd., 158 Kinoko, Sakura-shi, Chiba 285-0801, Japan

<sup>5</sup> Kajitsudo Co., Ltd. 1155-5, Tabaru, Mashiki-machi, Kamimashiki-gun, Kumamoto 861-2202, Japan

<sup>6</sup> Department of Oral and Maxillofacial Surgery, Faculty of Life Sciences, Kumamoto University, Kumamoto, Japan

# These authors equally contributed to this work.

#### Contact:

\*Address correspondence to:

Noriko Saitoh, Ph.D. (noriko.saito@jfcf.or.jp)

Division of Cancer Biology,

The Cancer Institute of JFCR,

3-8-31 Ariake, Koto-ku, Tokyo 135-8550, Japan

Tel: +81-3-3570-0471

Mitsuyoshi Nakao, M.D., Ph.D. (mitnakao@kumamoto-u.ac.jp)

Department of Medical Cell Biology

Institute of Molecular Embryology and Genetics, Kumamoto University

2-2-1 Honjo, Chuo-ku, Kumamoto 860-0811, Japan

Tel: +81-96-373-6800

### Supplementary Table 1

Ct values of Figure 2B

|              |               | Control | Resveratrol | Fr.4  | Fr.7  |  | Control | Fr.2  | Fr.3  |  | Control | Fr.6  |
|--------------|---------------|---------|-------------|-------|-------|--|---------|-------|-------|--|---------|-------|
| <i>ESR1</i>  | Ave.<br>(n=3) | 20.33   | 26.10       | 24.77 | 25.47 |  | 19.40   | 20.13 | 22.91 |  | 20.24   | 25.24 |
|              | SD            | 0.95    | 0.48        | 0.40  | 0.81  |  | 0.77    | 0.62  | 1.50  |  | 0.53    | 0.43  |
| <i>GAPDH</i> | Ave.<br>(n=3) | 15.61   | 17.03       | 16.49 | 17.65 |  | 15.67   | 15.94 | 16.50 |  | 15.52   | 16.96 |
|              | SD            | 0.24    | 0.17        | 0.35  | 0.95  |  | 0.38    | 0.12  | 0.70  |  | 0.51    | 0.33  |

### Supplementary Table 2

Ct value of Figure 4B

|              |               | Control | Resveratrol | Fr.6  | Glyceollin I |
|--------------|---------------|---------|-------------|-------|--------------|
| <i>ESR1</i>  | Ave.<br>(n=3) | 17.95   | 21.41       | 21.43 | 21.19        |
|              | SD            | 0.41    | 0.34        | 0.70  | 1.37         |
| <i>GAPDH</i> | Ave.<br>(n=3) | 15.96   | 16.15       | 16.07 | 15.95        |
|              | SD            | 0.14    | 0.50        | 0.99  | 0.50         |

**Supplementary Figure S1. Estradiol inhibited *Eleanors* and LTED cell proliferation.**

(A) FISH analysis showing that the *Eleanor* RNA cloud regressed in LTED cells treated with high concentrations of estradiol. Scale bar, 10  $\mu$ m. (B) The *ESR1* mRNA level was decreased by estradiol in LTED cells. The *ESR1* mRNA level was measured by qRT-PCR. Values were normalized against *GAPDH* mRNA, and values for cells treated with control (DMSO) in LTED cells were set to 1. The bars represent the means  $\pm$  S.D.  $n = 3$ ,  $**p < 0.01$ . (C) LTED cell proliferation was inhibited by high concentrations of estradiol. The values represent the means  $\pm$  S.D.  $n = 3$ ,  $**p < 0.01$ . (D) LTED cell growth was inhibited by estradiol in a dose-dependent manner. The values represent the means  $\pm$  S.D.  $n = 3$ . (E) Immunoblot showing that the ER protein levels were decreased in LTED cells by estradiol treatment. Actin was used as an internal control. MW, molecular weight. Full-length blots are presented in Supplementary Fig. S6.

**Supplementary Figure S2. Glyceollin I decreased the ER protein level and its transcriptional activity in LTED cells.**

(A) Immunoblot showing that the ER level was reduced by glyceollin

I in LTED cells. Actin was used as an internal control. Full-length blots are presented in Supplementary Fig. S6. (B) Quantitative RT-PCR showing that the expression levels of the ER target genes (*GREB1*, *TFF1*, *PGR*) decreased with glyceollin I treatment. The values for the control treatment were set to 1. The bars represent the means  $\pm$  S.D.  $n = 3$ ,  $*p < 0.05$ ,  $**p < 0.01$ .

**Supplementary Figure S3. The effects of resveratrol and glyceollin I on MCF7 and tamoxifen-resistant cells.**

(A) MCF7 cells were inhibited with resveratrol and glyceollin I in a dose-dependent manner. The effect of glyceollin I in MCF7 cells was lower than in LTED cells, while the effect of resveratrol was comparable in MCF7 and LTED cells (see Fig. 4E). (B) RNA FISH showing that the *Eleanor* RNA cloud was not detected in TamR cells. Scale bar, 10  $\mu$ m. (C) The level of *ESR1* mRNA decreased slightly by the glyceollin I treatment of TamR cells. Quantitative RT-PCR was performed to measure the relative *ESR1* mRNA levels in the indicated cells. Values were normalized against *GAPDH* mRNA, and values for cells treated with DMSO (control) in TamR cells were set to 1. The bars represent the means  $\pm$  S.D.  $n = 3$ ,  $*p < 0.05$ ;  $**p < 0.01$ . (D) Immunoblot showing that the ER protein levels slightly decreased with the glyceollin I

treatment of TamR cells. Actin was used as a loading control. Full-length blots are presented in Supplementary **Fig. S6. (E)** TamR cell proliferation was inhibited by glyceollin I. The cell growth was measured with a colorimetric assay at 490 nm (Kit-8). The values represent the means  $\pm$  S.D.  $n = 3$ , \*\*\* $p < 0.001$ .

**Supplementary Figure S4. Resveratrol, estradiol and glyceollin I induced apoptosis in LTED cells.**

FACS analysis of Annexin V positive cells. Treatment of LTED cells with resveratrol, estradiol and glyceollin I increased a population with intense labeling with Annexin V, as indicated by bars. Data from triplicate experiments are shown.

**Supplementary Figure S5. Glyceollin I exerts its inhibitory effect on *Eleanors* independently of ER.**

(A) Immunofluorescences confirmed ER degradation by RNAi knockdown. LTED cells were treated with siRNA targeted to the *ESR1* mRNA (si*ESR1*) or control siRNA (si*GL3*) for 24 h, and ER was stained with antibodies. Scale bar, 10  $\mu$ m. (B) FISH analysis of the *Eleanor* RNA cloud (green) in LTED nuclei (blue). *Eleanors* were inhibited by 50  $\mu$ M resveratrol, estradiol, or glyceollin I in the control knockdown (left,

from the second to the bottom row). *Eleanors* were recovered by ER knockdown in resveratrol or estradiol-treated LTED cells (right, the second or third row). On the other hand, the inhibition of *Eleanors* by glyceollin I was maintained even in the absence of ER (right, bottom row). All drug treatments were for 24 h. Scale bar, 10  $\mu$ m. (C) The activity of the mTOR pathway components was decreased by resveratrol and glyceollin I treatments in LTED cells. Immunoblotting revealed that the phosphorylation level of the mTOR substrate (phospho-p70 S6 kinases) decreased with glyceollin I treatment (middle panel), while the mTOR protein level did not change (top panel). Actin was used as a loading control (bottom panel). Full-length blots are presented in Supplementary Fig. S6. (D) The A to G mutation corresponding to ESR1<sup>Y537C</sup> was detected in a sub-population of LTED cells (black arrow). DNA sequencing profiles obtained from Sanger capillary electrophoreses are shown.

**Supplementary Figure S6. Original immunoblot images.**

Uncropped immunoblots for Figs S1E, S2A, S3D and S5C are shown. Separate blots are delineated with black lines.

**A**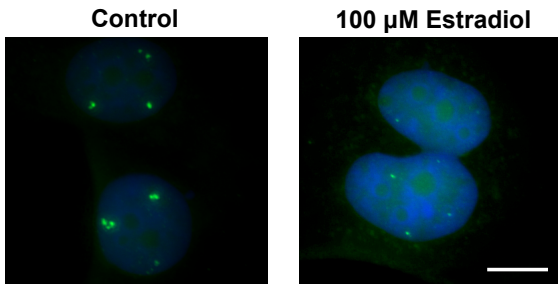**B**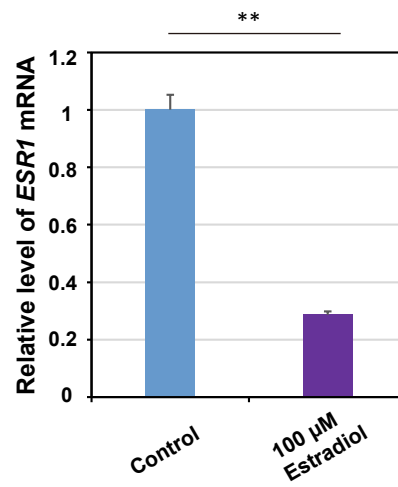**C**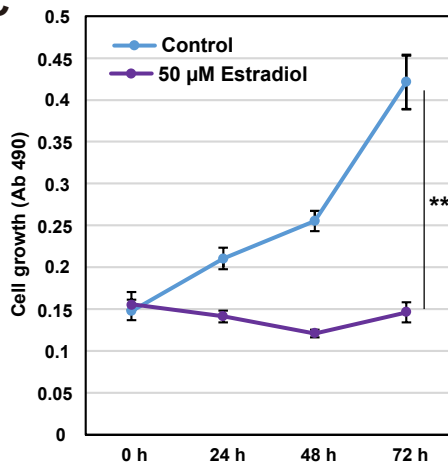**D**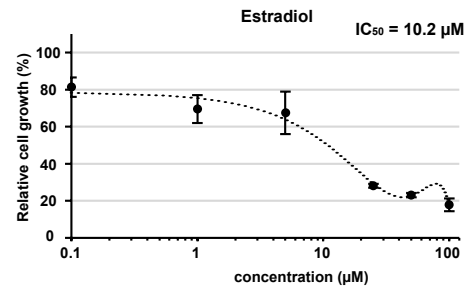**E**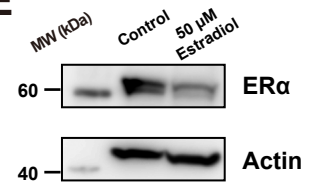

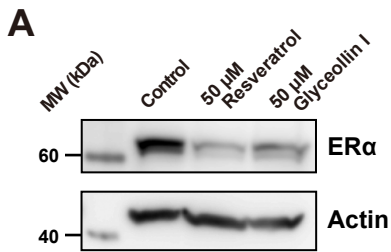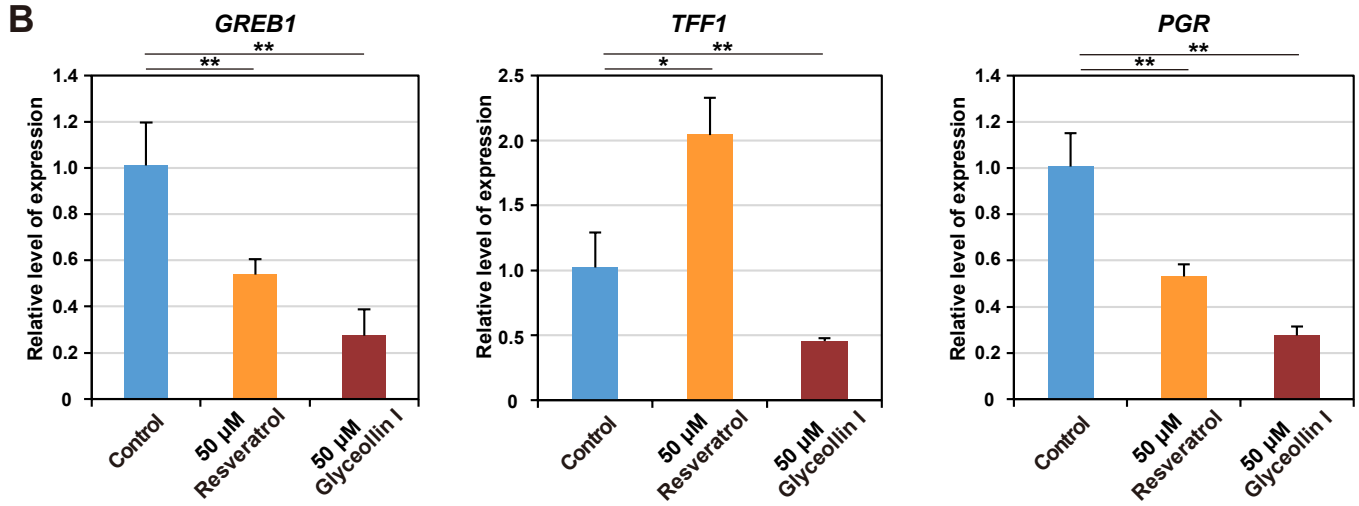



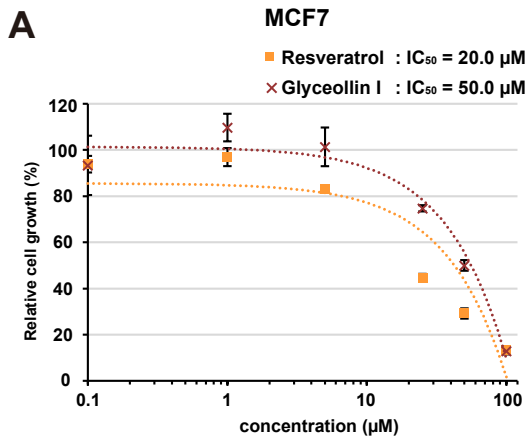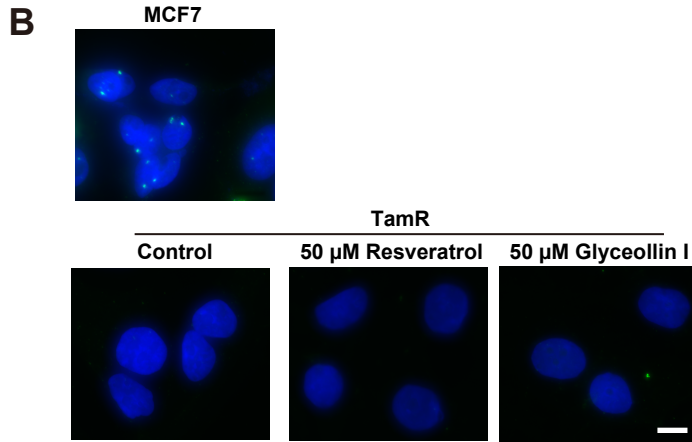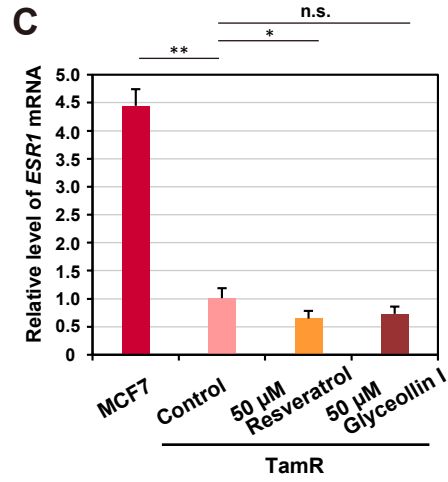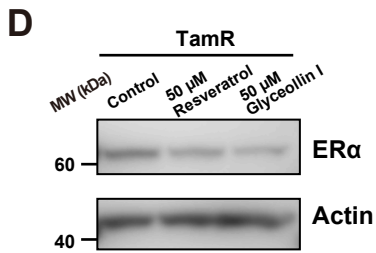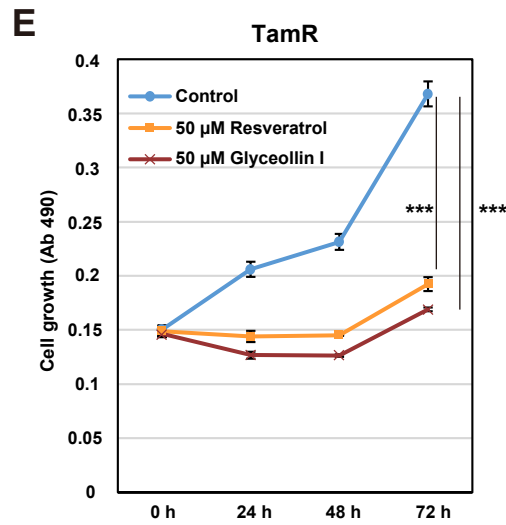

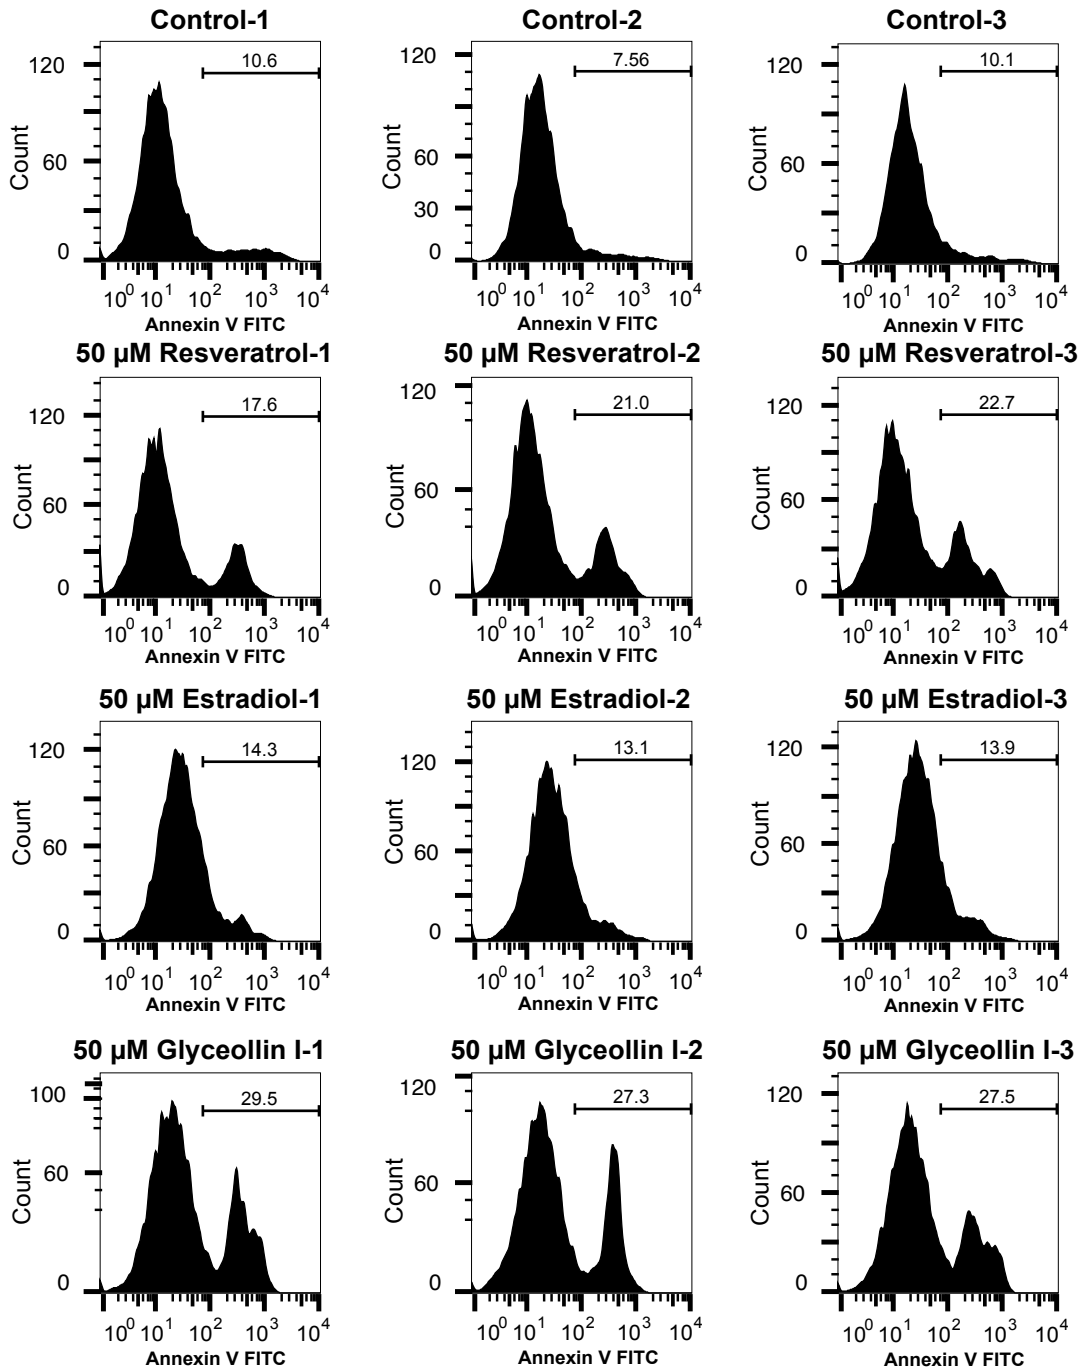

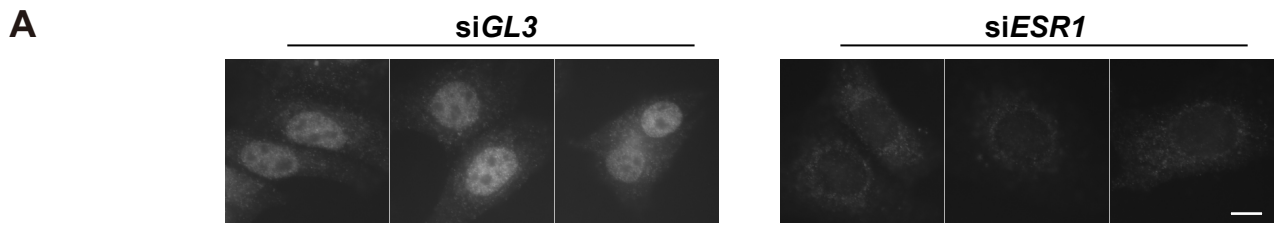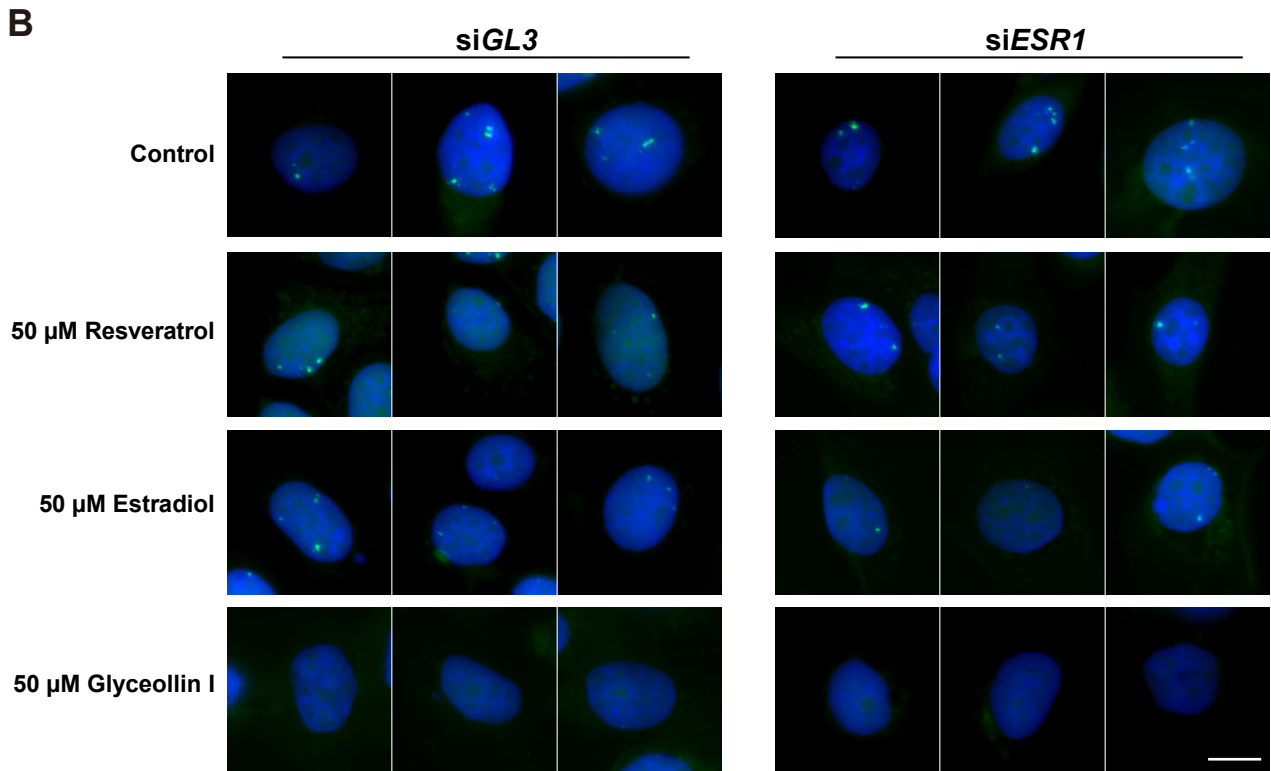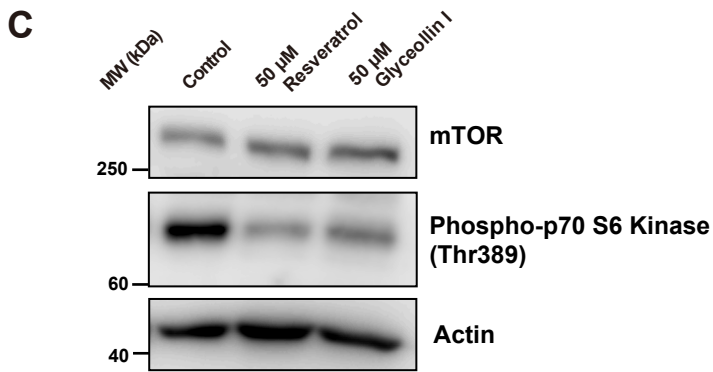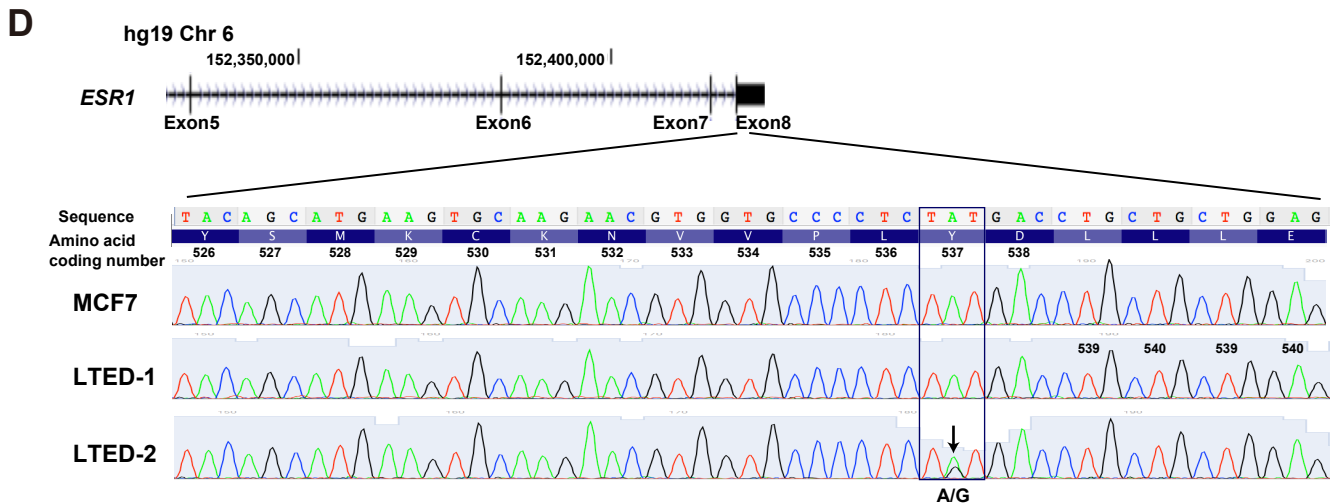

Supplementary Figure S1E, S2A

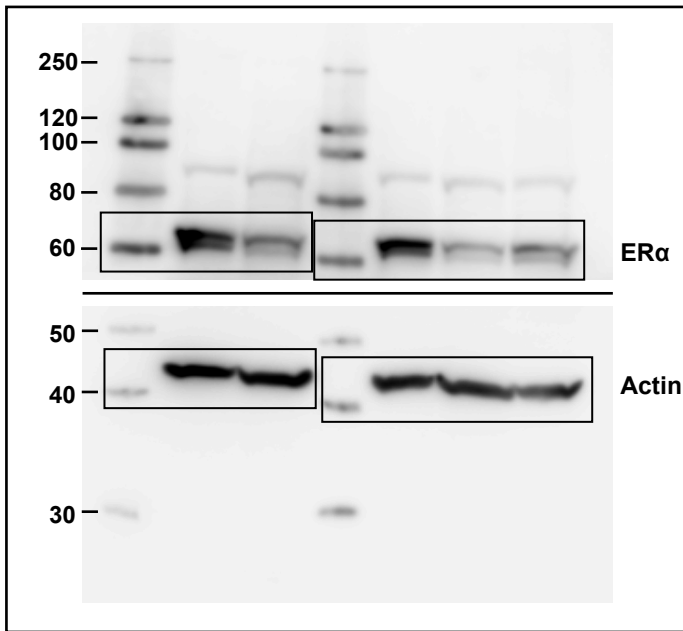

Supplementary Figure S3D

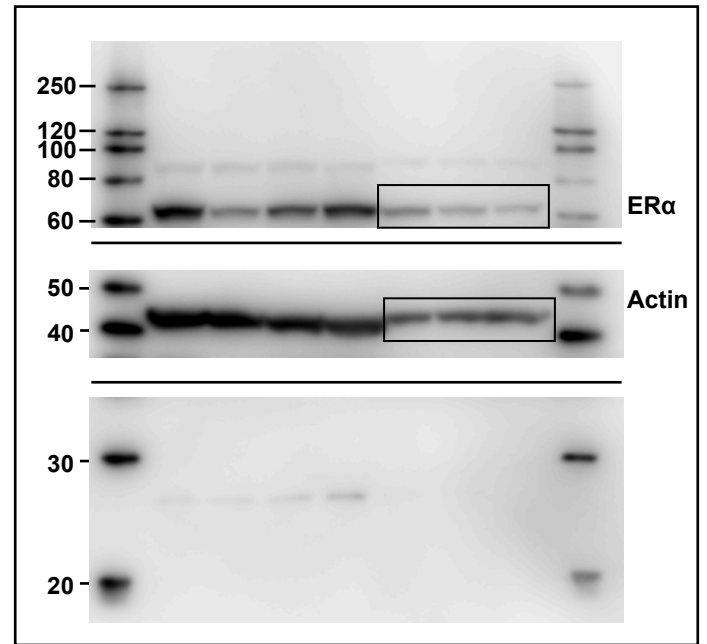

Supplementary Figure S5C

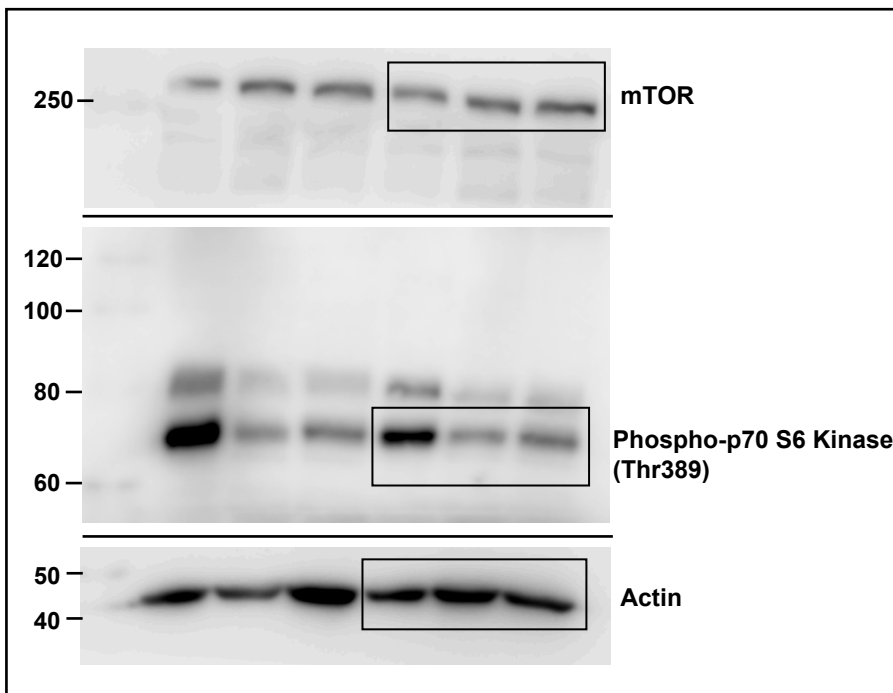

Supplement: 41598_2018_33227_MOESM1_ESM.pdf [file 41598_2018_33227_MOESM1_ESM.pdf]
